# Supplementary material for: Reproducing pyroclastic density currents deposits of the AD 79 eruption of the Somma-Vesuvius volcano using the box-model approach
Source: Copernicus journal article supplement (doi:10.5194/se-2020-138), 2020-10-09
Supplement: Supplementary file [file se-2020-138-AC1-supplement.pdf]

*Referee #1 (Greg Valentine)*

**This is a very nice and thorough manuscript. I have indicated some edits on the attached pdf, which will improve the presentation, but these are minor. Congratulations to the authors on this excellent work. Make sure to be clear at the end about your conclusion, something like: "The box model is a valuable tool for PDC modeling in situations where topography is relatively simple and smooth (such as the area south of Somma Vesuvius). On the other hand, caution must be used for cases of complex topography, where the effects of density stratification within the currents, which is not modeled with the box-model approach, plays a strong role in current behavior and deposition." This is basically the "punch line" of the paper and should be very clear both in the conclusions and in the abstract.**

Thank you for your kind words and your detailed revision of our manuscript. The suggested sentence is surely appropriate, and we have inserted it in the conclusion section, with minor modifications (LINES 566-569).

We have also added one more affiliation to Giovanni Biagioli (LINE 4).

#### **SPECIFIC COMMENTS (FROM THE ATTACHED PDF)**

**LINES 13** replace “In this study we” with “We”

Done (LINE 13).

**LINE 16** replace “Total Grain Size Distribution” with “total grain size distribution”

Done (LINE 16).

**LINE 17** delete “of Somma-Vesuvius (Italy)”

Done (LINE 17).

**LINE 20** replace “that we perform with PyBox were done considering” with “consider”

Done (LINES 20-21).

**LINE 22** readers will not know what ii is referring to - can more general terms be used at least in the abstract so that it is quickly readable by anyone? In the main text, these terms can be defined and used.

We have slightly modified the sentence (LINES 22-23).

**LINE 26** add “simplified”

Done (LINE 27). We have also removed the following “simplified”, which was redundant.

**LINE 27** replace “approaches adopted have promising” with “approach has promise for”

Done (LINE 28).

**LINE 27** this sentence is confusing - can it be rewritten to be clearer?

We have added a new explicatory sentence (LINES 28-30)

**LINE 33** replace “Pyroclastic Density Currents” with “pyroclastic density currents”

Done (LINE 35).

**LINE 37** in this introductory material, you might refer to others who have worked on this topic, such as Dufek. I think the Neri paper was 2-D (you referred to it as 3D)?

We corrected the Neri reference and added more references of Dufek and Todesco (LINES 39-40).

**LINE 45** replace “estimating” with “estimation of”.

Done (LINE 48).

**LINES 49** add “the” and delete “(described in section 2.1 and in Appendix A),”

Done (LINE 52).

**LINE 51** delete “remarkably” and replace “well-known” with “well-characterized”

Done (LINE 54).

**LINE 52** delete “(detailed in section 2.2)” and replace “It is indeed accepted that the” with “The”

Done (LINE 55).

**LINE 54** there were some problems with this application to Taupo, I believe (it was a long time since I read this, though).

We added a reference of the Wilson (1997) comment, and of the response of Dade and Huppert (LINES 57-58).

**LINE 57** delete “. Similar approaches have been adopted in literature” and add “see for example”

Done (LINE 61).

**LINE 60** delete “, section 5”

Done (LINE 65).

**LINE 61 delete “(section 6)”.**

Done (LINE 66)

**LINE 65 delete “The” and “code,” and add “,”.**

Done (LINE 69).

**LINE 68 delete “see”**

Done (LINE 72).

**LINE 70 delete “or cylindrical sector,”**

Done (LINE 74).

**LINE 77 replace “have a leading role” with “dominate”**

Done (LINE 81).

**LINE 78 replace “Thus, the particle” with “Particle”**

Done (LINE 82).

**LINE 82 replace “differs from considering” with “does not assume” and replace “(Dade and Huppert, 1998)” with “as in Dade and Huppert (1998)”**

Done (LINES 86-87).

**LINE 83 delete “further”.**

Done (LINE 87).

**LINE 88 I'm not sure what is meant by this sentence? Can you clarify?**

We added a reference to a note where we provide an explanatory example of what we mean (LINES 89-90).

**LINES 90-91 and 93 these two statements completely contradict each other. Please clarify.**

We apologize for this contradiction, we have removed the wrong sentence (LINES 98-99).

**LINE 93 not needed in this description of your model. Could mention it in the discussion, if there is an appropriate place. Delete “The thermodynamics of cooling effects are explored in Bursik and Woods (1996).”**

We have deleted this sentence (LINE 99).

**LINE 96** replace “simplifying hypotheses” with “simplifications” and delete “of all”

Done (LINE 102).

**LINE 99** add “turbulent mixing” and delete “the vertical mixing, due to turbulence, “

Done (LINE 105).

**LINE 101** this also could be put in discussion instead of here, in the description of your model

We prefer to keep this small sentence here as we feel it is important for the description of the model. We have however slightly modified the previous sentence (LINES 107-108).

**LINE 101** replace “is” with “was” and replace “in (see Fauria et al., 2016)” with “in Fauria et al. (2016)”

Done (LINES 107-108).

**LINE 105** delete “number expressing the”.

Done (LINE 111).

**LINE 117** replace “So, the” with “The”

Done (LINE 123).

**LINE 120** add “ground”

Done (LINE 126).

**LINE 121** add “, although not modeled, in nature”.

Done (LINE 128).

**LINE 124** delete “set” and add “is set”.

Done (LINE 130).

**LINES 127-128** how do you do that before comparing the KE to the PE? How do you handle obstacles that are not as high as the flow thickness?

We modified the sentence and clarified the meaning (LINES 134-139).

**LINE 140** replace “was characterized by” with “involved”

Done (LINE 147).

**LINE 141** delete “complex” and replace “Eruptive Units” with “eruptive units”

Done (LINE 148).

**LINE 146 what do the dotted and solid lines mean?**

Solid lines are the limits between EUs, dashed lines are the limits between levels (a, b and c), dotted lines are lithofacies stratifications. We have added this sentence in the caption of Figure 2 (LINES 153-154).

**LINE 150 delete “PDC deposits of the” and replace “record” with “records”**

Done (LINE 158).

**LINE 151 replace “(up to 10 km from vent area)” with “up to 10 km from vent area,”**

Done (LINE 159).

**LINE 152 replace “, so resulting in a complex” with “. Variability of”, delete “variability” and replace “possibly” with “are probably”**

Done (LINES 160-161).

**LINE 153 delete “tends to diminish”**

Done (LINE 162).

**LINE 154 add “decrease” and replace “(“ with “,”**

Done (LINES 162-163).

**LINE 155 delete “)”, replace “pointed out that: i) in the southern part of the” with “showed that the deposits reflect different topographic situations in different sectors around the volcano. South of” and delete “area”**

Done (LINES 163-165).

**LINE 156 delete “controlled”, add “affected” and replace “: ii) in” with “. In”**

Done (LINES 165-166).

**LINE 159 replace “; iii) in the western sector of SV,” with “. To the west,”**

Done (LINE 168).

**LINE 161 replace “several meters thick” with “several-meters-thick”**

We have modified the words into “several meters-thick” (LINE 170).

**LINES 161-162 replace “-“ with “;” and replace “; iv) in the” with “. In the”**

Done (LINE 171).

**LINE 162** replace “(with many valleys cut on steep slopes)” with “with many radial valleys cut on steep slopes,”

Done (LINES 171-172).

**LINE 166** delete “The AD 79”, replace “marks the reappraisal” with “records a subsequent phase” and delete “after the end of the Plinian phase”.

Done (LINE 175).

**LINE 169** delete two ‘ ’’.

Done (LINE 177). We have furthermore deleted the ‘ ‘ ‘ at LINES 178, 179 and 180. Finally, we have replaced, at LINES 182 and 183, the words “a2”, “b” and “b” with, respectively, “EU4a2”, “EU4b” and “EU4b”.

**LINE 170** replace “depositing” with “that deposited”, delete two ‘”’ and replace “is furthermore complicated” with “has additional complications”

Done (LINES 179-180).

**LINE 172** replace “level” with “horizon”

Done (LINE 182).

**LINE 175** replace “it was maximum toward south (up to about” with “to the south it was deposited up to ~” and replace “;” with “ (“

Done (LINES 184-185).

**LINE 177** delete two ‘”’ and add “bedding”

Done (LINE 187).

**LINE 187** delete “i.e.” and replace “/” with “,”

Done (LINE 197).

**LINE 188** replace “TGSD” with “(TGSD)”

Done (LINE 198).

**LINE 189** delete “(see sections 3.1.1 and 3.1.3)” and delete “(Barberi et al., 1989; section 3.1.2)”

Done (LINE 199).

**LINE 190** replace "; Cioni et al., 2004) are derived from the literature" with "are derived from Barberi et al. (1989) and Cioni et al. (2004)."

Done (LINES 200-201).

**LINE 191** remove paragraph break and replace "In summary, the" with "Total"

Done. We have also removed 4 "the" (LINE 201).

**LINE 192** replace "Thus, the" with "The"

Done (LINE 202).

**LINE 203** replace "Maximum Runout Lines" with "maximum runout lines"

Done (LINE 213).

**LINE 208** delete "i.e."

Done (LINE 218).

**LINE 270** replace "Due to the lack of reliable data, we have moreover" with "We"

Done (LINE 280).

**LINES 271** add "due to the lack of reliable data"

Done (LINE 281).

**LINE 281** seems unnecessary, delete "The False Negative case (no deposit nor simulation) has not been obviously calculated"

Done (LINE 291).

**LINE 291** replace "GSs" with "grain sizes"

Done (LINE 301).

**LINE 294** replace "More in" with "In"

Done (LINE 304).

**LINE 298** delete "forcedly"

Done (LINE 309).

**LINE 313** replace "Particularly, the present" with "The modern"

Done (LINE 324).

**LINE 318** replace “In particular,” with “We modeled”.

Done (LINE 329).

**LINE 357** delete “We remind that” and delete “code”

Done (LINE 368).

**LINE 358** replace “to” with “with”

Done (LINE 369).

**LINE 364** replace “vare” with “value” and replace “correspondence of” with “corresponding to”.

Done (LINE 375).

**LINE 377** add “, and where ~50% or more of the particles are relatively coarse,”

Done (LINES 388-389).

**LINES 378-379** delete “and considering an impacting mixture consisting of at least ca. 50% coarse particles (> 1 cm diameter) relative to fines (< 1 cm diameter),”.

Done (LINES 390-391).

**LINE 380** replace “PDCs” with “dense underflows”

Done (LINES 391-392).

**LINE 395** remove paragraph break

Done (LINE 406).

**LINES 411-412** replace “testifies the strongest interaction of the EU3pf unit with the non-homogeneous topography (see also Gurioli, 1999; Cioni et al., 2020) and” with “reflects”

Done (LINES 423-424).

**LINE 413** add “in areas of complex topography (Gurioli, 1999; Cioni et al., 2020)”

Done (LINES 425-426).

**LINE 447** replace “matching” with “match”, delete “tends to sensibly” and replace “overestimate” with “overestimates”

Done (LINE 459).

**LINE 448** what does it mean “equilibrate”?

We have replaced “equilibrate” with “balanced” (LINE 460).



**LINE 448** replace “motivated” with “related”

Done (LINE 460).

**LINE 449** replace “with” with “to” and replace “acts” with “act”.

Done (LINE 461).

**LINE 452** replace “overlapping” with “overlap”

Done (LINE 464).

**LINE 455** replace “always reminded” with “kept in mind”

Done (LINE 467).

**LINE 457** replace “We remark that, beyond” with “Beyond”

Done (LINE 469).

**LINE 458** replace “Shallow” with “Thin”

Done (LINE 470).

**LINE 459** replace “remark” with “note”

Done (LINE 471).

**LINE 467** replace “We note that this” with “This”

Done (LINE 479).

**LINE 468** delete “, that are”

Done (LINE 480).

**LINE 497** remove paragraph break

Done (LINE 508).

**LINE 520** replace “matching” with “match”

Done (LINE 531).

**LINE 521** replace “North-West” with “north-west” and delete “sensibly”

We have used NW and we have also replaced South-East with SE (LINE 532).

**LINE 524** replace “shallow” with “thin”

Done (LINE 535).

**LINE 540** replace “stratified features” with “density-stratified character” and replace “make” with “made”

Done (LINES 551-552).

**LINE 541** replace “In particular, results” with “Results”

Done (LINE 553).

**LINE 551** replace “We” with “However, we”

Done (LINE 563).

**LINE 552** replace “such” with “the”

Done (LINE 564).

**LINE 553** replace “which” with “situations where”

Done (LINE 565).
